# Supplementary material
Source: PubMed Central journal article supplement (PMC7094014)

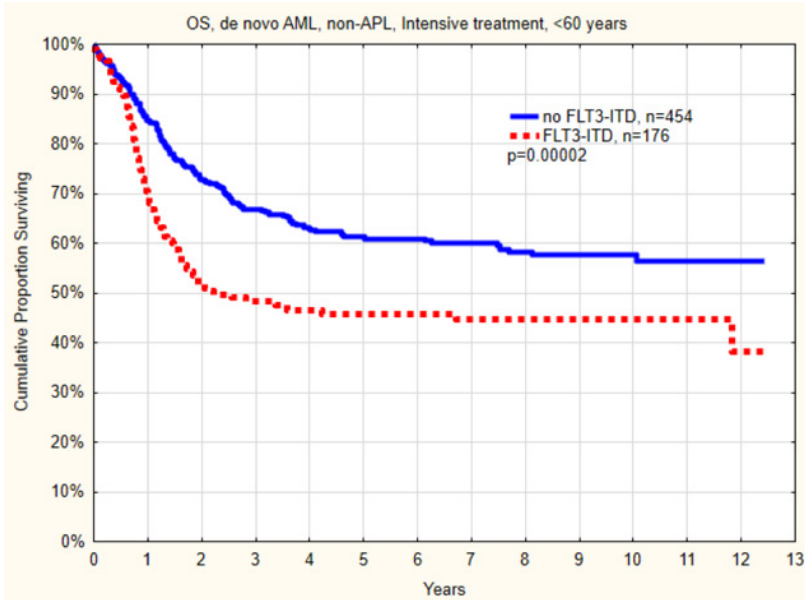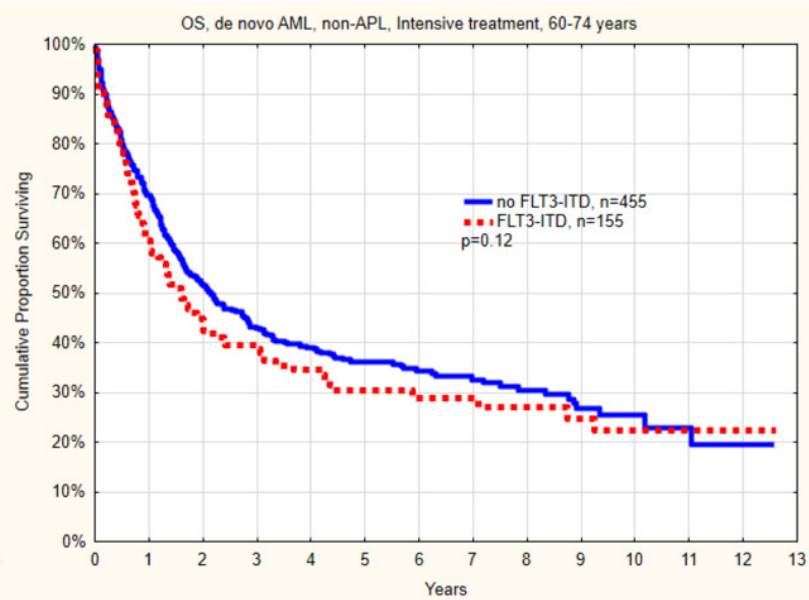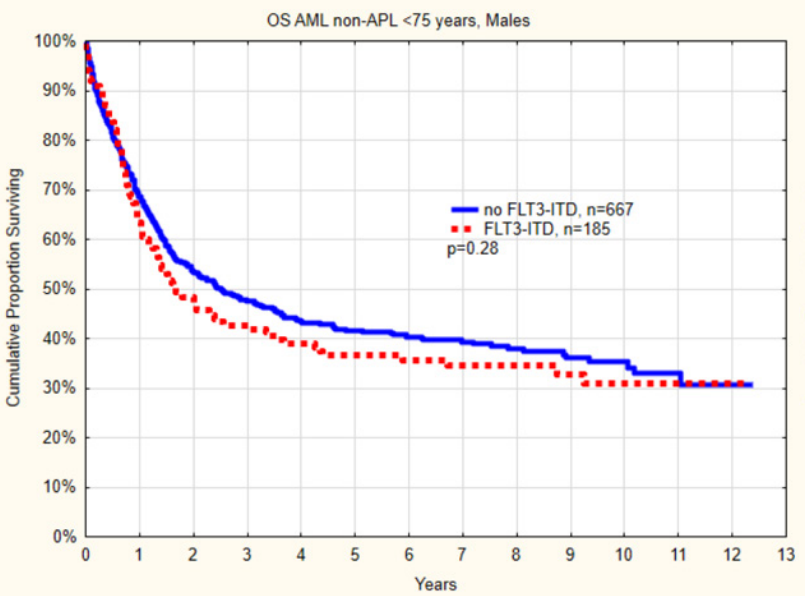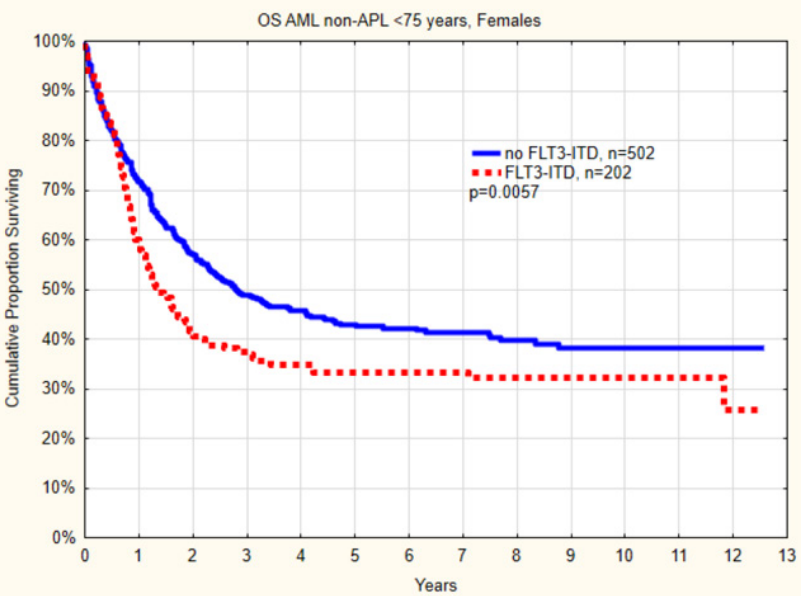

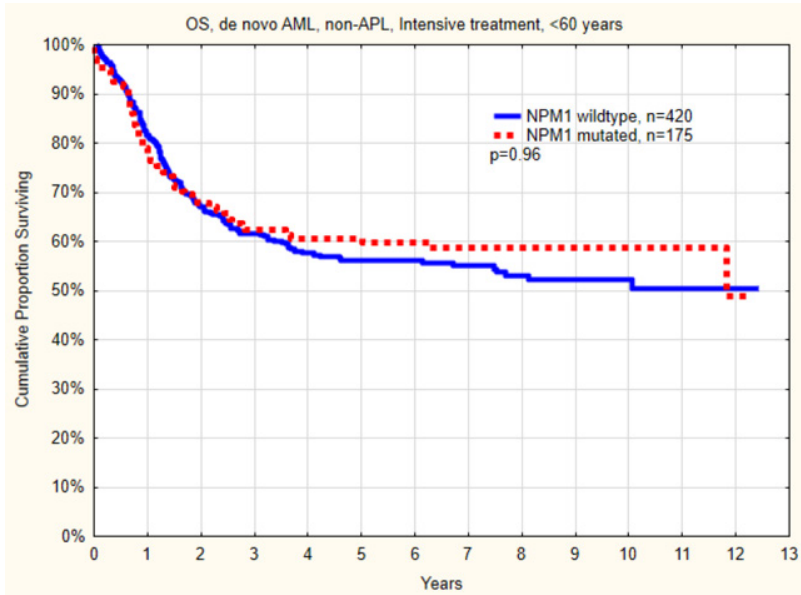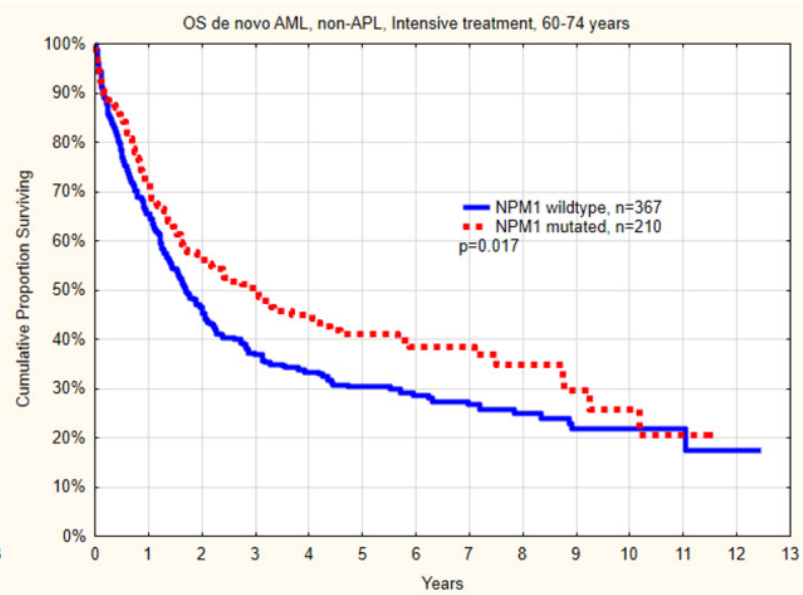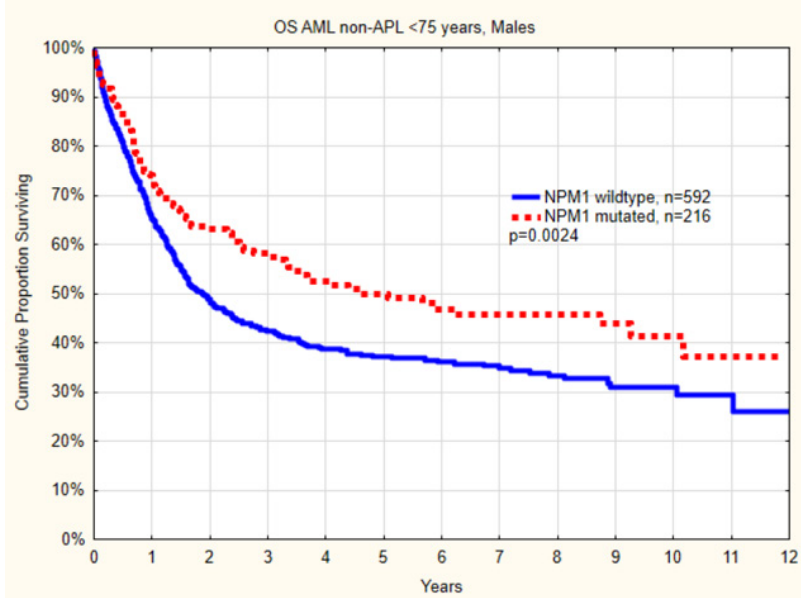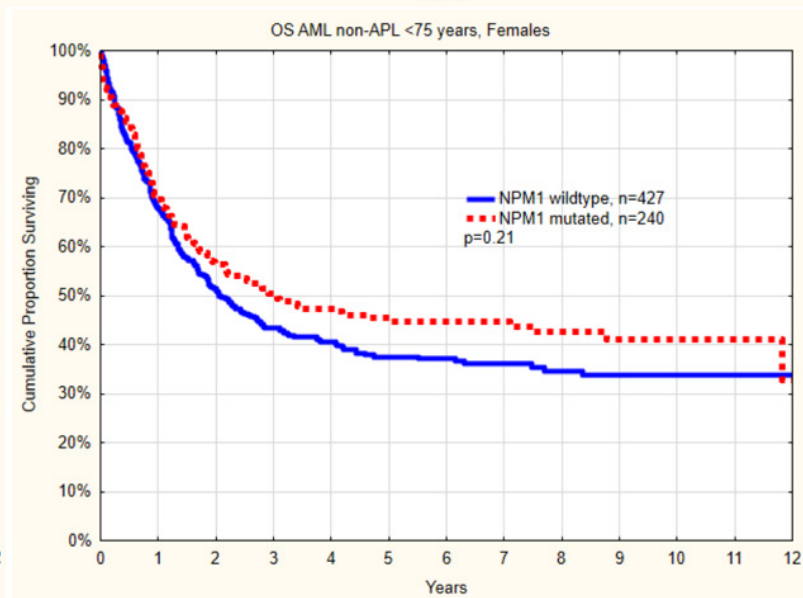

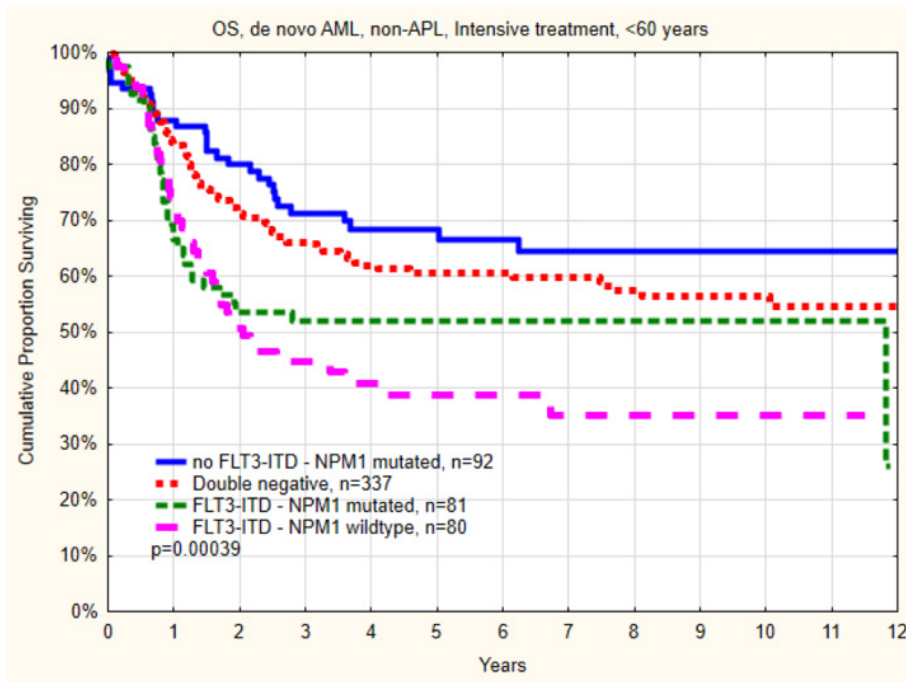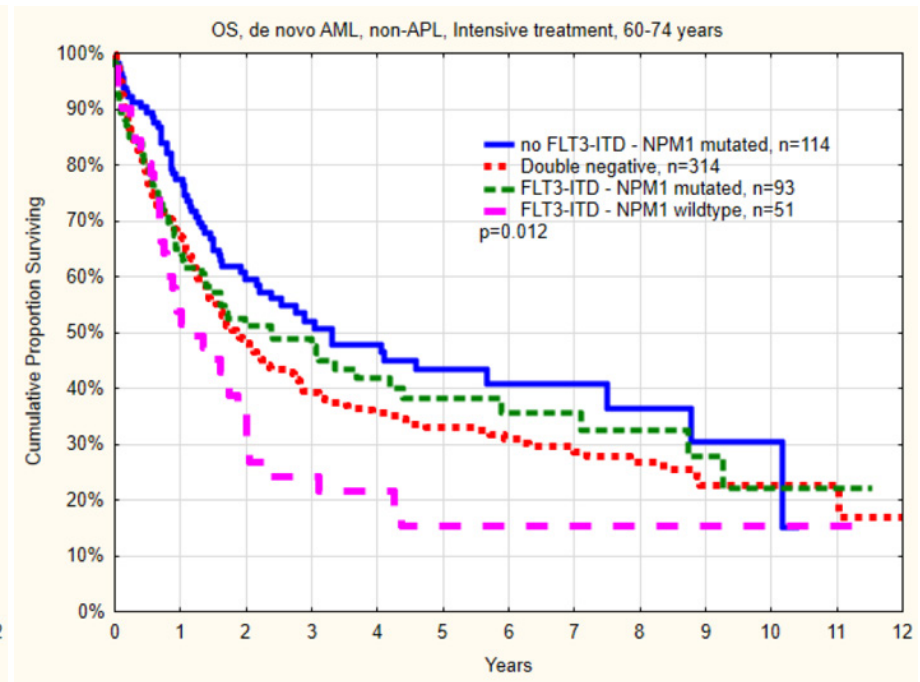

Supplement: advancesADV2019001335-suppl1.pdf [file advancesADV2019001335-suppl1.pdf]
